# Supplementary material
Source: PubMed Central journal article supplement (PMC6026067)
Supplement: NIHMS958503-supplement-supplement_1.pdf [file NIHMS958503-supplement-supplement_1.pdf]

**Supplementary Table 1: Stratified Analyses\* of Personal and Clinical Social Support and Discontinuation of AET (N=2,687)**

|                                        | % with outcome | Personal Social Support Categories |                    |                    | P**        | P†  |
|----------------------------------------|----------------|------------------------------------|--------------------|--------------------|------------|-----|
|                                        |                | High                               | Moderate           | Low                |            |     |
| <b>Age</b>                             |                |                                    |                    |                    |            |     |
| < 60 years of age, N                   |                | 503                                | 471                | 385                |            |     |
| HR                                     | 22%            | 1.00                               | 1.15               | 1.11               | .54        | .28 |
| 95% CI                                 |                |                                    | (0.87-1.52)        | (0.82-1.48)        |            |     |
| >= 60 years of age, N                  |                | 455                                | 451                | 422                |            |     |
| HR                                     | 26%            | 1.00                               | 1.26               | <b>1.41</b>        | <b>.02</b> |     |
| 95% CI                                 |                |                                    | (0.96-1.65)        | <b>(1.07-1.84)</b> |            |     |
| <b>Race/ethnicity</b>                  |                |                                    |                    |                    |            |     |
| White, N                               |                | 735                                | 687                | 589                |            |     |
| HR                                     | 25%            | 1.00                               | 1.20               | <b>1.26</b>        | <b>.05</b> | .83 |
| 95% CI                                 |                |                                    | (0.97-1.49)        | <b>(1.01-1.57)</b> |            |     |
| AA, API, Hispanic, Other, N‡           |                | 223                                | 235                | 218                |            |     |
| HR                                     | 21%            | 1.00                               | 1.06               | 1.45               | .07        |     |
| 95% CI                                 |                | 735                                | 687                | 589                |            |     |
| <b>Level of Education</b>              |                |                                    |                    |                    |            |     |
| Some college or less, N                |                | 485                                | 426                | 379                |            |     |
| HR                                     | 27%            | 1.00                               | <b>1.29</b>        | <b>1.38</b>        | <b>.02</b> | .72 |
| 95% CI                                 |                |                                    | <b>(1.00-1.67)</b> | <b>(1.06-1.80)</b> |            |     |
| College graduate or more, N            |                | 473                                | 496                | 426                |            |     |
| HR                                     | 21%            | 1.00                               | 1.08               | 1.13               | .42        |     |
| 95% CI                                 |                |                                    | (0.81-1.44)        | (0.84-1.51)        |            |     |
| <b>Stage</b>                           |                |                                    |                    |                    |            |     |
| Early stage, N                         |                | 870                                | 839                | 726                |            |     |
| HR                                     | 25%            | 1.00                               | 1.20               | <b>1.28</b>        | <b>.02</b> | .94 |
| 95% CI                                 |                |                                    | (0.98-1.47)        | <b>(1.04-1.57)</b> |            |     |
| Late stage, N                          |                | 88                                 | 83                 | 81                 |            |     |
| HR                                     | 20%            | 1.00                               | 1.11               | 1.14               | .74        |     |
| 95% CI                                 |                |                                    | (0.53-2.33)        | (0.53-2.45)        |            |     |
| <b>Type of endocrine therapy</b>       |                |                                    |                    |                    |            |     |
| Tamoxifen-only, N                      |                | 228                                | 209                | 177                |            |     |
| HR                                     | 26%            | 1.00                               | 1.25               | 1.40               | .11        | .88 |
| 95% CI                                 |                |                                    | (0.85-1.85)        | (0.93-2.10)        |            |     |
| AI-only, N                             |                | 555                                | 523                | 476                |            |     |
| HR                                     | 24%            | 1.00                               | 1.13               | <b>1.31</b>        | <b>.03</b> |     |
| 95% CI                                 |                |                                    | (0.87-1.46)        | <b>(1.02-1.69)</b> |            |     |
| Both tamoxifen and AI, N               |                | 175                                | 190                | 154                |            |     |
| HR                                     | 24%            | 1.00                               | 1.34               | 1.42               | .19        |     |
| 95% CI                                 |                |                                    | (0.85-2.12)        | (0.86-2.33)        |            |     |
| <b>Presence of menopausal symptoms</b> |                |                                    |                    |                    |            |     |

|                                        |     |      |                    |                    |            |     |
|----------------------------------------|-----|------|--------------------|--------------------|------------|-----|
| No, N                                  |     | 308  | 281                | 209                |            |     |
| HR                                     | 23% | 1.00 | 1.22               | 1.42               | .07        | .61 |
| 95% CI                                 |     |      | (0.86-1.75)        | (0.97-2.07)        |            |     |
| Yes, N                                 |     | 650  | 641                | 598                |            |     |
| HR                                     | 26% | 1.00 | 1.17               | <b>1.26</b>        | <b>.05</b> |     |
| 95% CI                                 |     |      | (0.93-1.47)        | <b>(1.01-1.59)</b> |            |     |
| <b>Presence of comorbidities</b>       |     |      |                    |                    |            |     |
| No, N                                  |     | 812  | 762                | 661                |            |     |
| HR                                     | 25% | 1.00 | <b>1.26</b>        | <b>1.30</b>        | <b>.02</b> | .78 |
| 95% CI                                 |     |      | <b>(1.02-1.54)</b> | <b>(1.05-1.61)</b> |            |     |
| Yes, N                                 |     | 67   | 92                 | 86                 |            |     |
| HR                                     | 25% | 1.00 | 0.94               | 1.21               | .51        |     |
| 95% CI                                 |     |      | (0.46-1.92)        | (0.62-2.34)        |            |     |
| <b>Presence of Depressive Symptoms</b> |     |      |                    |                    |            |     |
| Low presence, N                        |     | 619  | 500                | 298                |            |     |
| HR                                     | 16% | 1.00 | 1.19               | 1.12               | .41        | .83 |
| 95% CI                                 |     |      | (0.92-1.54)        | (0.83-1.51)        |            |     |
| High presence, N                       |     | 334  | 417                | 500                |            |     |
| HR                                     | 27% | 1.00 | 1.16               | 1.22               | .19        |     |
| 95% CI                                 |     |      | (0.87-1.60)        | (0.92-1.63)        |            |     |

|                              |     | <b>% with outcome</b> | <b>Clinical Social Support Categories</b> |                    |            | <b>P**</b> | <b>P†</b> |
|------------------------------|-----|-----------------------|-------------------------------------------|--------------------|------------|------------|-----------|
|                              |     |                       | <b>High</b>                               | <b>Moderate</b>    | <b>Low</b> |            |           |
| <b>Age</b>                   |     |                       |                                           |                    |            |            |           |
| < 60 years of age, N         |     | 503                   | 471                                       | 385                |            |            |           |
| HR                           | 22% | 1.00                  | 1.15                                      | <b>1.37</b>        | <b>.03</b> | .98        |           |
| 95% CI                       |     |                       | (0.86-1.54)                               | <b>(1.04-1.81)</b> |            |            |           |
| >= 60 years of age, N        |     | 455                   | 451                                       | 422                |            |            |           |
| HR                           | 26% | 1.00                  | 1.16                                      | <b>1.36</b>        | <b>.02</b> |            |           |
| 95% CI                       |     |                       | (0.89-1.51)                               | <b>(1.03-1.79)</b> |            |            |           |
| <b>Race/ethnicity</b>        |     |                       |                                           |                    |            |            |           |
| White, N                     |     | 735                   | 687                                       | 589                |            |            |           |
| HR                           | 25% | 1.00                  | 1.12                                      | <b>1.27</b>        | <b>.05</b> | .37        |           |
| 95% CI                       |     |                       | (0.91-1.40)                               | <b>(1.03-1.58)</b> |            |            |           |
| AA, API, Hispanic, Other, N‡ |     | 223                   | 235                                       | 218                |            |            |           |
| HR                           | 21% | 1.00                  | 1.36                                      | <b>1.55</b>        | <b>.04</b> |            |           |
| 95% CI                       |     |                       | (0.87-2.12)                               | <b>(1.05-2.29)</b> |            |            |           |
| <b>Level of Education</b>    |     |                       |                                           |                    |            |            |           |
| Some college or less, N      |     | 485                   | 426                                       | 379                |            |            |           |
| HR                           | 27% | 1.00                  | <b>1.67</b>                               | <b>1.32</b>        | <b>.03</b> | .78        |           |
| 95% CI                       |     |                       | <b>(1.02-1.71)</b>                        | <b>(1.02-1.71)</b> |            |            |           |
| College graduate or more, N  |     | 473                   | 496                                       | 426                |            |            |           |
| HR                           | 21% | 1.00                  | 1.17                                      | <b>1.42</b>        | <b>.02</b> |            |           |

|                                        |        |      |                    |                    |                    |     |  |
|----------------------------------------|--------|------|--------------------|--------------------|--------------------|-----|--|
|                                        | 95% CI |      |                    | (0.87-1.57)        | <b>(1.07-1.87)</b> |     |  |
| <b>Stage</b>                           |        |      |                    |                    |                    |     |  |
| Early stage, N                         | 25%    | 870  | 839                | 726                |                    |     |  |
| HR                                     |        | 1.00 | 1.21               | <b>1.39</b>        | <b>&lt;.01</b>     | .72 |  |
| 95% CI                                 |        |      | (0.99-1.47)        | <b>(1.14-1.68)</b> |                    |     |  |
| Late stage, N                          | 20%    | 88   | 83                 | 81                 |                    |     |  |
| HR                                     |        | 1.00 | 0.73               | 1.02               | .85                |     |  |
| 95% CI                                 |        |      | (0.33-1.60)        | (0.49-2.11)        |                    |     |  |
| <b>Type of endocrine therapy</b>       |        |      |                    |                    |                    |     |  |
| Tamoxifen-only, N                      |        | 228  | 209                | 177                |                    |     |  |
| HR                                     | 26%    | 1.00 | <b>1.89</b>        | <b>1.74</b>        | <b>&lt;.01</b>     | .89 |  |
| 95% CI                                 |        |      | <b>(1.24-2.86)</b> | <b>(1.16-2.61)</b> |                    |     |  |
| AI-only, N                             |        | 555  | 523                | 476                |                    |     |  |
| HR                                     | 24%    | 1.00 | 1.06               | <b>1.42</b>        | <b>&lt;.01</b>     |     |  |
| 95% CI                                 |        |      | (0.81-1.37)        | <b>(1.11-1.82)</b> |                    |     |  |
| Both Tamoxifen and AI, N               |        | 175  | 190                | 154                |                    |     |  |
| HR                                     | 24%    | 1.00 | 0.91               | 0.91               | .62                |     |  |
| 95% CI                                 |        |      | (0.58-1.43)        | (0.58-1.43)        |                    |     |  |
| <b>Presence of menopausal symptoms</b> |        |      |                    |                    |                    |     |  |
| No menopausal symptoms, N              |        | 308  | 281                | 209                |                    |     |  |
| HR                                     | 23%    | 1.00 | 1.13               | 1.36               | <b>.03</b>         | .96 |  |
| 95% CI                                 |        |      | (0.77-1.67)        | (0.94-1.96)        |                    |     |  |
| Menopausal symptoms, N                 |        | 650  | 641                | 598                |                    |     |  |
| HR                                     | 26%    | 1.00 | 1.67               | <b>1.36</b>        | <b>.01</b>         |     |  |
| 95% CI                                 |        |      | (0.93-1.46)        | <b>(1.09-1.70)</b> |                    |     |  |
| <b>Presence of comorbidities</b>       |        |      |                    |                    |                    |     |  |
| No, N                                  |        | 812  | 762                | 661                |                    |     |  |
| HR                                     | 25%    | 1.00 | 1.17               | <b>1.36</b>        | <b>&lt;.01</b>     | .58 |  |
| 95% CI                                 |        |      | (0.95-1.50)        | <b>(1.11-1.67)</b> |                    |     |  |
| Yes, N                                 |        | 67   | 92                 | 86                 |                    |     |  |
| HR                                     | 25%    | 1.00 | 0.86               | 1.31               | .44                |     |  |
| 95% CI                                 |        |      | (0.44-1.70)        | (0.68-2.52)        |                    |     |  |
| <b>Presence of Depressive Symptoms</b> |        |      |                    |                    |                    |     |  |
| Low presence, N                        |        | 619  | 500                | 298                |                    |     |  |
| HR                                     | 16%    | 1.00 | 1.18               | <b>1.34</b>        | <b>.04</b>         | .37 |  |
| 95% CI                                 |        |      | (0.90-1.55)        | <b>(1.04-1.77)</b> |                    |     |  |
| High presence, N                       | 27%    | 334  | 417                | 500                |                    |     |  |
| HR                                     |        | 1.00 | 1.05               | 1.19               | .17                |     |  |
| 95% CI                                 |        |      | (0.79-1.39)        | (0.92-1.54)        |                    |     |  |

\*Models adjusted for Model 2 covariates except for stratified variable

\*\*p-value, test for trend; †p-value, test for interaction

‡AA=African-American, API=Asian/Pacific Islander

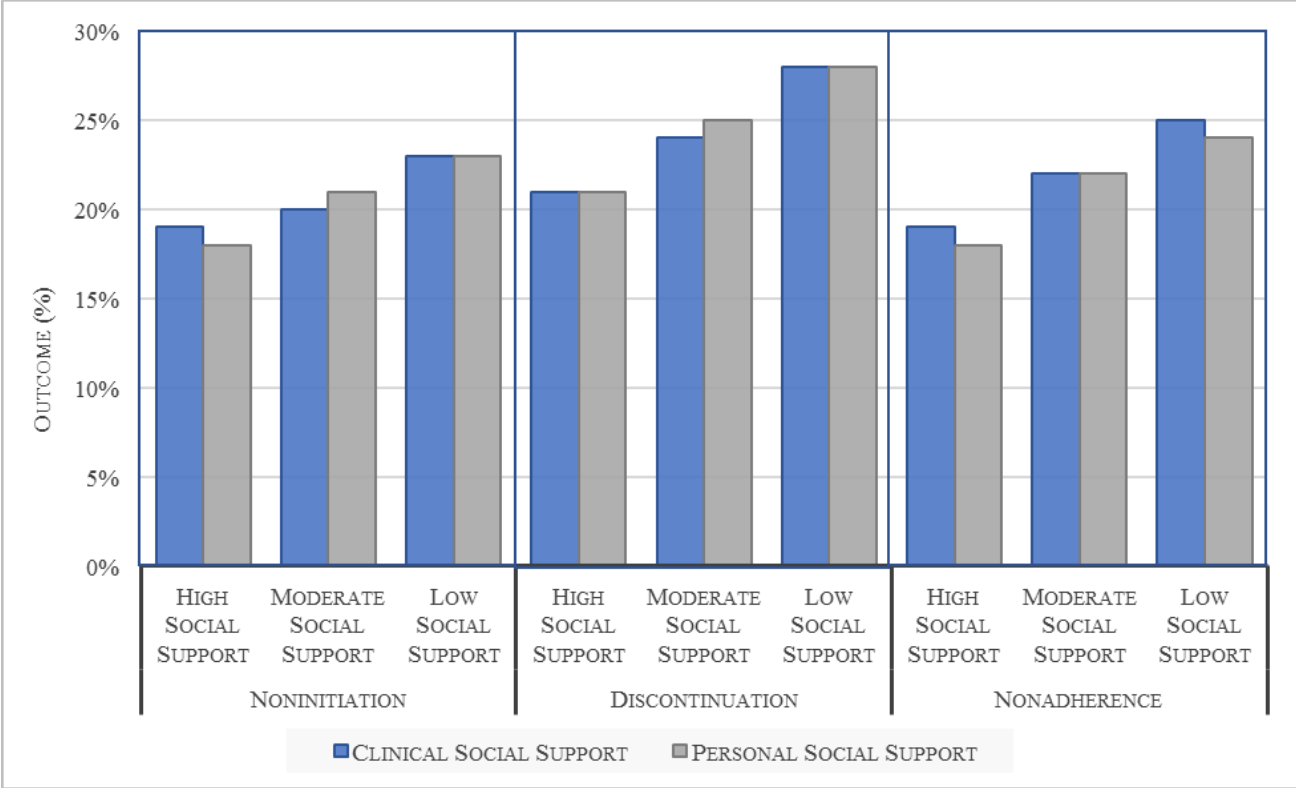

**Supplementary Figure 1:** Proportion of Noninitiation, Discontinuation, and Nonadherence to Adjuvant Endocrine Therapy by Level of Personal and Clinical Social Support (N=3,382\*)

\*Analyses of outcomes of discontinuation and nonadherence included 2,687 women who initiated treatment and filled at least two prescriptions.
